# Supplementary material for: Co-Occurrence of Mycotoxins in Feed for Cattle, Pigs, Poultry, and Sheep in Navarra, a Region of Northern Spain
Source: MDPI journal article supplement (doi:10.3390/toxins15030172), 2023-02-22
Supplement: s1 [file s1]

# Supplementary Materials: Co-Occurrence of Mycotoxins in Feed for Cattle, Pigs, Poultry, and Sheep in Navarra, a Region of Northern Spain

Borja Muñoz-Solano and Elena González-Peñas

**Table S1.** Obtained calibration curves in the chromatographic sequence in which feed for cattle was analysed.

| ng/mL | AFG2          |                        | AFB2          |                        |
|-------|---------------|------------------------|---------------|------------------------|
|       | B.C. (ng/mL)  | RE (%)                 | B.C. (ng/mL)  | RE (%)                 |
| 0.126 | 0.119         | 5.5                    | 0.117         | 7.2                    |
| 0.189 | 0.180         | 4.9                    | 0.181         | 4.5                    |
| 0.252 | 0.252         | 0.0                    | 0.248         | 1.5                    |
| 0.315 | 0.315         | 0.1                    | 0.315         | 0.0                    |
| 0.504 | 0.515         | 2.1                    | 0.521         | 3.4                    |
| 0.63  | 0.645         | 2.5                    | 0.646         | 2.6                    |
| 1.26  | 1.250         | 0.8                    | 1.248         | 1.0                    |
|       | y=17.82x+0.83 | R <sup>2</sup> =0.9994 | y=57.62x+0.55 | R <sup>2</sup> =0.9990 |
| ng/mL | OTA           |                        | OTB           |                        |
|       | B.C. (ng/mL)  | RE (%)                 | B.C. (ng/mL)  | RE (%)                 |
| 1     | 1.1           | 6.0                    | 1.0           | 3.2                    |
| 1.5   | 1.5           | 2.2                    | 1.5           | 3.1                    |
| 2     | 2.0           | 0.9                    | 1.9           | 3.2                    |
| 2.5   | 2.4           | 4.0                    | 2.6           | 2.6                    |
| 4     | 4.0           | 0.4                    | 4.0           | 0.6                    |
| 5     | 5.1           | 1.7                    | 5.0           | 0.0                    |
| 10    | 10.0          | 0.2                    | 10.0          | 0.1                    |
|       | y=7.19x+1.46  | R <sup>2</sup> =0.9996 | y=6.31x+0.61  | R <sup>2</sup> =0.9998 |
| ng/mL | AFG1          |                        | AFB1          |                        |
|       | B.C. (ng/mL)  | RE (%)                 | B.C. (ng/mL)  | RE (%)                 |
| 0.4   | 0.4           | 5.9                    | 0.4           | 6.0                    |
| 0.6   | 0.6           | 2.9                    | 0.6           | 0.1                    |
| 0.8   | 0.8           | 0.6                    | 0.8           | 3.2                    |
| 1     | 1.0           | 1.5                    | 1.0           | 3.2                    |
| 1.6   | 1.6           | 1.4                    | 1.6           | 0.3                    |
| 2     | 2.1           | 3.8                    | 2.0           | 1.9                    |
| 4     | 4.0           | 0.9                    | 4.0           | 0.3                    |
|       | y=7.73x+0.18  | R <sup>2</sup> =0.9991 | y=23.68x+0.31 | R <sup>2</sup> =0.9996 |
| ng/mL | ZEA           |                        |               |                        |
|       | B.C. (ng/mL)  | RE (%)                 | B.C. (ng/mL)  | RE (%)                 |
| 8.4   | 7.8           | 7.5                    |               |                        |
| 12.6  | 12.3          | 2.6                    |               |                        |

|      |                |              |  |
|------|----------------|--------------|--|
| 16.8 | 17.0           | 0.9          |  |
| 21   | 21.4           | 1.7          |  |
| 33.6 | 33.0           | 1.8          |  |
| 42   | 43.6           | 3.8          |  |
| 84   | 83.4           | 0.7          |  |
|      | $y=0.25x+1.74$ | $R^2=0.9990$ |  |

**Table S2.** Obtained calibration curves in the chromatographic sequence in which feed for pigs was analysed.

| ng/mL | AFG2            |              | AFB2            |              |
|-------|-----------------|--------------|-----------------|--------------|
|       | B.C. (ng/mL)    | RE (%)       | B.C. (ng/mL)    | RE (%)       |
| 0.126 | 0.119           | 5.9          | 0.118           | 6.6          |
| 0.189 | 0.184           | 2.5          | 0.183           | 3.1          |
| 0.252 | 0.249           | 1.0          | 0.245           | 3.0          |
| 0.315 | 0.309           | 1.8          | 0.314           | 0.3          |
| 0.504 | 0.514           | 2.0          | 0.521           | 3.4          |
| 0.63  | 0.652           | 3.5          | 0.648           | 2.8          |
| 1.26  | 1.248           | 0.9          | 1.248           | 1.0          |
|       | $y=17.58x+1.19$ | $R^2=0.9991$ | $y=57.91x+0.51$ | $R^2=0.9990$ |
| ng/mL | OTA             |              | OTB             |              |
|       | B.C. (ng/mL)    | RE (%)       | B.C. (ng/mL)    | RE (%)       |
| 1     | 1.1             | 5.7          | 0.9             | 6.3          |
| 1.5   | 1.5             | 2.1          | 1.5             | 2.8          |
| 2     | 2.0             | 0.2          | 1.9             | 3.9          |
| 2.5   | 2.4             | 3.9          | 2.6             | 4.2          |
| 4     | 4.0             | 0.5          | 4.1             | 2.2          |
| 5     | 5.1             | 2.2          | 5.0             | 1.0          |
| 10    | 10.0            | 0.3          | 9.9             | 0.6          |
|       | $y=7.18x+1.51$  | $R^2=0.9995$ | $y=6.20x+0.81$  | $R^2=0.9994$ |
| ng/mL | AFG1            |              | AFB1            |              |
|       | B.C. (ng/mL)    | RE (%)       | B.C. (ng/mL)    | RE (%)       |
| 0.4   | 0.4             | 5.0          | 0.4             | 8.0          |
| 0.6   | 0.6             | 2.6          | 0.6             | 1.0          |
| 0.8   | 0.8             | 3.3          | 0.8             | 4.0          |
| 1     | 1.0             | 0.6          | 1.0             | 2.9          |
| 1.6   | 1.6             | 1.5          | 1.6             | 0.2          |
| 2     | 2.1             | 3.4          | 2.0             | 1.2          |
| 4     | 4.0             | 0.9          | 4.0             | 0.1          |
|       | $y=7.72x+0.09$  | $R^2=0.9991$ | $y=23.72x+0.18$ | $R^2=0.9996$ |
| ng/mL | ZEA             |              |                 |              |
|       | B.C. (ng/mL)    | RE (%)       | B.C. (ng/mL)    | RE (%)       |
| 8.4   | 7.7             | 8.2          |                 |              |
| 12.6  | 12.7            | 0.4          |                 |              |
| 16.8  | 16.8            | 0.2          |                 |              |

|      |                |              |  |
|------|----------------|--------------|--|
| 21   | 20.4           | 2.8          |  |
| 33.6 | 34.0           | 1.3          |  |
| 42   | 43.6           | 3.8          |  |
| 84   | 83.3           | 0.9          |  |
|      | $y=0.25x+1.70$ | $R^2=0.9990$ |  |

**Table S3.** Obtained calibration curves in the chromatographic sequence in which feed for poultry was analysed.

| ng/mL | AFG2            |              | AFB2            |              |
|-------|-----------------|--------------|-----------------|--------------|
|       | B.C. (ng/mL)    | RE (%)       | B.C. (ng/mL)    | RE (%)       |
| 0.126 | 0.118           | 6.1          | 0.114           | 9.6          |
| 0.189 | 0.185           | 1.9          | 0.178           | 5.7          |
| 0.252 | 0.246           | 2.5          | 0.247           | 2.0          |
| 0.315 | 0.309           | 1.8          | 0.313           | 0.7          |
| 0.504 | 0.523           | 3.7          | 0.527           | 4.6          |
| 0.63  | 0.646           | 2.6          | 0.654           | 3.9          |
| 1.26  | 1.248           | 0.9          | 1.243           | 1.3          |
|       | $y=17.50x+1.14$ | $R^2=0.9990$ | $y=57.59x+0.55$ | $R^2=0.9982$ |
| ng/mL | OTA             |              | OTB             |              |
|       | B.C. (ng/mL)    | RE (%)       | B.C. (ng/mL)    | RE (%)       |
| 1     | 1.1             | 7.2          | 0.9             | 5.8          |
| 1.5   | 1.5             | 3.0          | 1.4             | 3.4          |
| 2     | 2.0             | 1.1          | 1.9             | 3.8          |
| 2.5   | 2.4             | 4.7          | 2.6             | 3.7          |
| 4     | 4.0             | 0.5          | 4.1             | 2.3          |
| 5     | 5.1             | 2.2          | 5.1             | 1.2          |
| 10    | 10.0            | 0.2          | 9.9             | 0.6          |
|       | $y=7.17x+1.50$  | $R^2=0.9994$ | $y=6.19x+0.84$  | $R^2=0.9994$ |
| ng/mL | AFG1            |              | AFB1            |              |
|       | B.C. (ng/mL)    | RE (%)       | B.C. (ng/mL)    | RE (%)       |
| 0.4   | 0.4             | 8.6          | 0.4             | 7.2          |
| 0.6   | 0.6             | 3.0          | 0.6             | 0.5          |
| 0.8   | 0.8             | 4.2          | 0.8             | 4.2          |
| 1     | 1.0             | 1.5          | 1.0             | 3.7          |
| 1.6   | 1.6             | 2.3          | 1.6             | 0.7          |
| 2     | 2.1             | 4.0          | 2.0             | 1.9          |
| 4     | 4.0             | 1.1          | 4.0             | 0.3          |
|       | $y=7.70x+0.08$  | $R^2=0.9986$ | $y=23.66x+0.32$ | $R^2=0.9995$ |
| ng/mL | ZEA             |              |                 |              |
|       | B.C. (ng/mL)    | RE (%)       | B.C. (ng/mL)    | RE (%)       |
| 8.4   | 7.6             | 9.0          |                 |              |
| 12.6  | 12.1            | 4.3          |                 |              |
| 16.8  | 16.6            | 1.3          |                 |              |
| 21    | 21.0            | 0.2          |                 |              |

|      |                                     |     |  |
|------|-------------------------------------|-----|--|
| 33.6 | 34.3                                | 2.1 |  |
| 42   | 43.8                                | 4.4 |  |
| 84   | 83.0                                | 1.2 |  |
|      | y=0.24x+1.74 R <sup>2</sup> =0.9986 |     |  |

**Table S4.** Obtained calibration curves in the chromatographic sequence in which feed for sheep was analysed.

| ng/mL | AFG2                                 |        | AFB2                                 |        |
|-------|--------------------------------------|--------|--------------------------------------|--------|
|       | B.C. (ng/mL)                         | RE (%) | B.C. (ng/mL)                         | RE (%) |
| 0.126 | 0.118                                | 6.0    | 0.118                                | 6.7    |
| 0.189 | 0.175                                | 7.6    | 0.180                                | 5.0    |
| 0.252 | 0.258                                | 2.4    | 0.244                                | 3.1    |
| 0.315 | 0.312                                | 1.1    | 0.311                                | 1.4    |
| 0.504 | 0.525                                | 4.3    | 0.531                                | 5.3    |
| 0.63  | 0.638                                | 1.2    | 0.648                                | 2.9    |
| 1.26  | 1.250                                | 0.8    | 1.245                                | 1.2    |
|       | y=17.78x+0.91 R <sup>2</sup> =0.9990 |        | y=57.60x+0.64 R <sup>2</sup> =0.9984 |        |
| ng/mL | OTA                                  |        | OTB                                  |        |
|       | B.C. (ng/mL)                         | RE (%) | B.C. (ng/mL)                         | RE (%) |
| 1     | 1.1                                  | 8.2    | 0.9                                  | 8.4    |
| 1.5   | 1.5                                  | 2.1    | 1.5                                  | 3.2    |
| 2     | 2.0                                  | 0.7    | 1.9                                  | 3.0    |
| 2.5   | 2.4                                  | 5.4    | 2.6                                  | 3.7    |
| 4     | 4.0                                  | 0.0    | 4.1                                  | 2.6    |
| 5     | 5.1                                  | 2.6    | 5.1                                  | 1.3    |
| 10    | 10.0                                 | 0.3    | 9.9                                  | 0.7    |
|       | y=7.13x+1.64 R <sup>2</sup> =0.9992  |        | y=6.21x+0.77 R <sup>2</sup> =0.9993  |        |
| ng/mL | AFG1                                 |        | AFB1                                 |        |
|       | B.C. (ng/mL)                         | RE (%) | B.C. (ng/mL)                         | RE (%) |
| 0.4   | 0.4                                  | 2.4    | 0.4                                  | 7.2    |
| 0.6   | 0.6                                  | 3.8    | 0.6                                  | 0.5    |
| 0.8   | 0.8                                  | 4.3    | 0.8                                  | 4.2    |
| 1     | 1.0                                  | 1.6    | 1.0                                  | 3.7    |
| 1.6   | 1.6                                  | 1.5    | 1.6                                  | 0.7    |
| 2     | 2.1                                  | 2.9    | 2.0                                  | 1.9    |
| 4     | 4.0                                  | 0.8    | 4.0                                  | 0.3    |
|       | y=7.73x+0.10 R <sup>2</sup> =0.9992  |        | y=23.66x+0.32 R <sup>2</sup> =0.9994 |        |
| ng/mL | ZEA                                  |        |                                      |        |
|       | B.C. (ng/mL)                         | RE (%) | B.C. (ng/mL)                         | RE (%) |
| 8.4   | 7.5                                  | 10.4   |                                      |        |
| 12.6  | 12.8                                 | 1.3    |                                      |        |
| 16.8  | 16.8                                 | 0.2    |                                      |        |
| 21    | 21.0                                 | 0.1    |                                      |        |
| 33.6  | 34.2                                 | 1.7    |                                      |        |

|              |      |           |
|--------------|------|-----------|
| 42           | 42.6 | 1.4       |
| 84           | 83.5 | 0.6       |
| y=0.25x+1.85 |      | R2=0.9996 |

**Table S5.** Retention times for calibrators and samples for each mycotoxin.

|             | AFG2         | AFG1         | AFB2         | AFB1         | OTB          | ZEA          | OTA          |
|-------------|--------------|--------------|--------------|--------------|--------------|--------------|--------------|
| Calibrators | 11.06 ± 0.09 | 15.28 ± 0.08 | 19.60 ± 0.10 | 26.62 ± 0.05 | 33.58 ± 0.10 | 37.44 ± 0.09 | 39.93 ± 0.10 |
| Samples     | 11.10 ± 0.10 | 15.30 ± 0.10 | 19.40 ± 0.10 | 26.70 ± 0.11 | ND           | 37.50 ± 0.10 | 39.95 ± 0.09 |

**Table S6.** Levels (µg/kg) of mycotoxins in feed for cattle.

| Sample | AFG2  | AFG1 | AFB2 | AFB1 | OTB  | ZEA  | OTA  | DON   | STER |
|--------|-------|------|------|------|------|------|------|-------|------|
| cow-1  | <LOD* | <LOD | <LOD | <LOD | <LOD | 147  | <LOD | <LOQ* | <LOQ |
| cow-2  | <LOD  | <LOD | 1.37 | <LOD | <LOD | 239  | <LOD | 217   | <LOQ |
| cow-3  | <LOD  | 2.47 | <LOD | <LOD | <LOD | <LOD | <LOD | <LOQ  | <LOQ |
| cow-4  | 2.51  | <LOD | <LOD | <LOD | <LOD | <LOD | 6.91 | 321   | <LOQ |
| cow-5  | <LOD  | <LOD | <LOD | <LOD | <LOD | 158  | <LOD | 115   | <LOQ |
| cow-6  | <LOD  | <LOD | <LOD | <LOD | <LOD | 169  | <LOD | 278   | <LOQ |
| cow-7  | <LOD  | <LOD | <LOD | <LOD | <LOD | 123  | <LOD | 402   | <LOQ |
| cow-8  | <LOD  | <LOD | <LOD | <LOD | <LOD | <LOD | <LOD | <LOQ  | <LOQ |
| cow-9  | <LOD  | <LOD | <LOD | 3.34 | <LOD | 66   | <LOD | <LOQ  | <LOQ |
| cow-10 | <LOD  | <LOD | <LOD | <LOD | <LOD | <LOD | <LOD | <LOQ  | <LOQ |
| cow-11 | <LOD  | <LOD | <LOD | 3.06 | <LOD | 78   | <LOD | 123   | <LOQ |
| cow-12 | <LOD  | <LOD | <LOD | <LOD | <LOD | <LOD | <LOD | <LOQ  | <LOQ |
| cow-13 | 2.11  | <LOD | <LOD | <LOD | <LOD | 334  | <LOD | 297   | <LOQ |
| cow-14 | <LOD  | <LOD | <LOD | <LOD | <LOD | 58   | <LOD | 321   | <LOQ |
| cow-15 | <LOD  | 2.92 | <LOD | <LOD | <LOD | 50   | <LOD | 125   | <LOQ |
| cow-16 | <LOD  | <LOD | <LOD | <LOD | <LOD | <LOD | <LOD | 247   | <LOQ |
| cow-17 | <LOD  | <LOD | <LOD | <LOD | <LOD | 258  | <LOD | 164   | <LOQ |
| cow-18 | <LOD  | <LOD | <LOD | <LOD | <LOD | <LOD | 7.74 | 230   | <LOQ |
| cow-19 | <LOD  | <LOD | 2.56 | <LOD | <LOD | <LOD | <LOD | 87    | <LOQ |
| cow-20 | <LOD  | <LOD | <LOD | <LOD | <LOD | 146  | <LOD | 95    | <LOQ |
| cow-21 | <LOD  | <LOD | <LOD | <LOD | <LOD | <LOD | <LOD | 99    | <LOQ |
| cow-22 | <LOD  | <LOD | <LOD | 4.31 | <LOD | 60   | <LOD | 97    | <LOQ |
| cow-23 | <LOD  | <LOD | <LOD | <LOD | <LOD | 68   | <LOD | 101   | <LOQ |
| cow-24 | 0.66  | <LOD | 0.78 | <LOD | <LOD | 79   | <LOD | <LOQ  | <LOQ |
| cow-25 | <LOD  | <LOD | <LOD | <LOD | <LOD | <LOD | <LOD | <LOQ  | <LOQ |
| cow-26 | <LOD  | <LOD | <LOD | <LOD | <LOD | <LOD | <LOD | 100   | <LOQ |
| cow-27 | <LOD  | <LOD | <LOD | <LOD | <LOD | 65   | <LOD | 157   | <LOQ |
| cow-28 | <LOD  | <LOD | 1.49 | 5.43 | <LOD | <LOD | <LOD | 169   | <LOQ |
| cow-29 | <LOD  | <LOD | <LOD | <LOD | <LOD | 314  | <LOD | <LOQ  | <LOQ |
| cow-30 | <LOD  | <LOD | <LOD | <LOD | <LOD | 210  | <LOD | 214   | <LOQ |
| cow-31 | <LOD  | <LOD | <LOD | <LOD | <LOD | 156  | <LOD | 201   | <LOQ |
| cow-32 | 1.97  | 3.41 | <LOD | <LOD | <LOD | <LOD | <LOD | 364   | <LOQ |
| cow-33 | <LOD  | <LOD | <LOD | <LOD | <LOD | <LOD | <LOD | 287   | <LOQ |
| cow-34 | <LOD  | <LOD | <LOD | <LOD | <LOD | 69   | <LOD | 304   | <LOQ |
| cow-35 | <LOD  | <LOD | <LOD | <LOD | <LOD | <LOD | <LOD | 206   | <LOQ |
| cow-36 | <LOD  | <LOD | 0.94 | <LOD | <LOD | <LOD | <LOD | 127   | <LOQ |

| Sample | AFG2 | AFG1 | AFB2 | AFB1 | OTB  | ZEA  | OTA  | DON  | STER |
|--------|------|------|------|------|------|------|------|------|------|
| cow-37 | <LOD | <LOD | <LOD | <LOD | <LOD | 90.6 | <LOD | 156  | <LOQ |
| cow-38 | <LOD | <LOD | <LOD | 2.47 | <LOD | <LOD | <LOD | 187  | <LOQ |
| cow-39 | 0.97 | <LOD | <LOD | <LOD | <LOD | 110  | <LOD | 164  | <LOQ |
| cow-40 | <LOD | <LOQ | <LOQ |
| cow-41 | <LOD | <LOD | 1.98 | <LOD | <LOD | <LOD | <LOD | 97   | <LOQ |
| cow-42 | <LOD | <LOD | <LOD | <LOD | <LOD | 51   | <LOD | <LOQ | <LOQ |
| cow-43 | <LOD | <LOD | <LOD | <LOD | <LOD | 58   | <LOD | 132  | <LOQ |
| cow-44 | <LOD | <LOD | <LOD | <LOD | <LOD | 76   | <LOD | 125  | <LOQ |
| cow-45 | 0.83 | 3.03 | <LOD | <LOD | <LOD | 73   | <LOD | 120  | <LOQ |
| cow-46 | <LOD | 117  | <LOQ |
| cow-47 | <LOD | 99   | <LOQ |
| cow-48 | <LOD | <LOD | <LOD | 2.85 | <LOD | <LOD | <LOD | 105  | <LOQ |
| cow-49 | <LOD | <LOD | <LOD | <LOD | <LOD | 95.7 | <LOD | 132  | <LOQ |
| cow-50 | <LOD | <LOD | <LOD | <LOD | <LOD | <LOD | 5.39 | 165  | <LOQ |
| cow-51 | <LOD | <LOD | <LOD | <LOD | <LOD | 80   | <LOD | 154  | <LOQ |
| cow-52 | <LOD | 197  | <LOQ |
| cow-53 | <LOD | <LOD | <LOD | <LOD | <LOD | 85.6 | <LOD | 146  | <LOQ |
| cow-54 | <LOD | <LOD | <LOD | 3.14 | <LOD | <LOD | <LOD | 198  | <LOQ |
| cow-55 | 3.25 | <LOD | <LOD | <LOD | <LOD | <LOD | <LOD | 177  | <LOQ |
| cow-56 | <LOD | 161  | <LOQ |
| cow-57 | <LOD | <LOD | <LOD | <LOD | <LOD | 101  | <LOD | 147  | <LOQ |
| cow-58 | <LOD | <LOQ | <LOQ |
| cow-59 | <LOD | 115  | <LOQ |
| cow-60 | <LOD | <LOD | <LOD | <LOD | <LOD | 99.8 | <LOD | 136  | <LOQ |
| cow-61 | <LOD | 107  | <LOQ |
| cow-62 | <LOD | <LOQ | <LOQ |
| cow-63 | 1.29 | <LOD | 1.32 | <LOD | <LOD | 118  | <LOD | 115  | <LOQ |
| cow-64 | <LOD | <LOQ | <LOQ |
| cow-65 | <LOD | <LOQ | <LOQ |
| cow-66 | <LOD | <LOD | <LOD | 2.41 | <LOD | 214  | 5.87 | 189  | <LOQ |
| cow-67 | <LOD | <LOD | <LOD | <LOD | <LOD | 254  | <LOD | 117  | <LOQ |
| cow-68 | <LOD | <LOD | <LOD | <LOD | <LOD | 126  | <LOD | 235  | <LOQ |
| cow-69 | <LOD | <LOD | <LOD | <LOD | <LOD | <LOD | 6.64 | 97   | <LOQ |
| cow-70 | <LOD | 123  | <LOQ |
| cow-71 | <LOD | <LOQ | <LOQ |
| cow-72 | <LOD | 2.66 | <LOD | <LOD | <LOD | <LOD | <LOD | <LOQ | <LOQ |
| cow-73 | <LOD | <LOD | <LOD | <LOD | <LOD | 98.8 | <LOD | 165  | <LOQ |
| cow-74 | <LOD | <LOQ | <LOQ |
| cow-75 | <LOD | <LOD | <LOD | <LOD | <LOD | 88.5 | <LOD | 177  | <LOQ |
| cow-76 | <LOD | <LOD | 3.21 | 4.87 | <LOD | <LOD | <LOD | 189  | <LOQ |
| cow-77 | <LOD | <LOD | <LOD | <LOD | <LOD | 114  | <LOD | 115  | <LOQ |
| cow-78 | <LOD | 165  | <LOQ |
| cow-79 | <LOD | <LOD | <LOD | <LOD | <LOD | 155  | <LOD | 235  | <LOQ |
| cow-80 | <LOD | 81   | <LOQ |
| cow-81 | <LOD | <LOD | 0.7  | <LOD | <LOD | <LOD | <LOD | <LOQ | 3.3  |
| cow-82 | <LOD | 101  | 3.9  |



| Sample | AFG2 | AFG1 | AFB2 | AFB1 | OTB  | ZEA  | OTA  | DON  | STER |
|--------|------|------|------|------|------|------|------|------|------|
| pig-23 | <LOD | <LOD | <LOD | 6.13 | <LOD | 328  | <LOD | 99   | <LOQ |
| pig-24 | 0.76 | <LOD | <LOD | <LOD | <LOD | <LOD | <LOD | 84   | <LOQ |
| pig-25 | <LOD | 76   | <LOQ |
| pig-26 | <LOD | 102  | 2.1  |
| pig-27 | <LOD | <LOD | <LOD | <LOD | <LOD | 236  | <LOD | 281  | <LOQ |
| pig-28 | <LOD | 191  | <LOQ |
| pig-29 | <LOD | 193  | 3.9  |
| pig-30 | <LOD | <LOD | 1.89 | <LOD | <LOD | <LOD | <LOD | <LOQ | <LOQ |
| pig-31 | 0.7  | <LOD | 1.97 | 5.89 | <LOD | 114  | <LOD | 111  | <LOQ |
| pig-32 | <LOD | <LOQ | <LOQ |
| pig-33 | <LOD | 89   | <LOQ |
| pig-34 | <LOD | 187  | <LOQ |
| pig-35 | <LOD | <LOD | <LOD | <LOD | <LOD | 89.9 | <LOD | 145  | <LOQ |
| pig-36 | <LOD | <LOD | <LOD | <LOD | <LOD | 98.5 | 65.5 | 162  | <LOQ |
| pig-37 | <LOD | <LOD | <LOD | <LOD | <LOD | 107  | <LOD | 87   | <LOQ |
| pig-38 | <LOD | 130  | <LOQ |
| pig-39 | <LOD | 145  | <LOQ |
| pig-40 | 3.12 | 5.1  | <LOD | <LOD | <LOD | <LOD | <LOD | 117  | <LOQ |
| pig-41 | <LOD | 89   | <LOQ |
| pig-42 | <LOD | 96   | <LOQ |
| pig-43 | 3.98 | 3.08 | <LOD | <LOD | <LOD | 389  | <LOD | 187  | <LOQ |
| pig-44 | <LOD | <LOD | 2.25 | 4.63 | <LOD | 92.3 | 5.91 | 130  | <LOQ |
| pig-45 | <LOD | <LOQ | <LOQ |
| pig-46 | <LOD | <LOQ | <LOQ |
| pig-47 | <LOD | <LOD | <LOD | <LOD | <LOD | 105  | <LOD | <LOQ | <LOQ |
| pig-48 | <LOD | 145  | <LOQ |
| pig-49 | <LOD | 6.03 | <LOD | 6.24 | <LOD | <LOD | <LOD | <LOQ | <LOQ |
| pig-50 | <LOD | <LOD | 0.81 | <LOD | <LOD | <LOD | <LOD | <LOQ | <LOQ |
| pig-51 | <LOD | 165  | <LOQ |
| pig-52 | <LOD | <LOD | <LOD | <LOD | <LOD | 168  | <LOD | 314  | <LOQ |
| pig-53 | <LOD | <LOQ | <LOQ |
| pig-54 | <LOD | <LOD | <LOD | <LOD | <LOD | 142  | <LOD | 225  | <LOQ |
| pig-55 | 1.31 | 2.64 | <LOD | <LOD | <LOD | 115  | <LOD | 76   | <LOQ |
| pig-56 | <LOD | <LOQ | <LOQ |
| pig-57 | <LOD | <LOQ | <LOQ |
| pig-58 | <LOD | <LOD | <LOD | <LOD | <LOD | 160  | <LOD | 158  | <LOQ |
| pig-59 | <LOD | <LOD | 2.87 | <LOD | <LOD | <LOD | <LOD | 112  | <LOQ |
| pig-60 | <LOD | <LOD | <LOD | <LOD | <LOD | 74   | <LOD | <LOQ | <LOQ |
| pig-61 | 0.84 | <LOD | <LOD | <LOD | <LOD | 80   | <LOD | 223  | <LOQ |
| pig-62 | <LOD | <LOD | <LOD | <LOD | <LOD | 59   | <LOD | <LOQ | <LOQ |
| pig-63 | <LOD | <LOD | <LOD | <LOD | <LOD | 74   | <LOD | 278  | <LOQ |
| pig-64 | <LOD | 91   | <LOQ |
| pig-65 | <LOD | 2.15 | <LOD | <LOD | <LOD | <LOD | <LOD | 100  | <LOQ |
| pig-66 | <LOD | <LOQ | <LOQ |
| pig-67 | <LOD | <LOD | <LOD | <LOD | <LOD | 254  | 42.3 | 129  | <LOQ |
| pig-68 | <LOD | 4.51 | <LOD | <LOD | <LOD | <LOD | <LOD | 100  | <LOQ |







[illegible]

\*LOD (ug/kg)    0.63    2.0    0.63    2.0    5.0    42.0    5.0  
\*LOQ (ug/kg)    1.26    4.0    1.26    4.0    10.0    84.0    10.0    74.0    0.8  
Italics: value >LOD <LOQ

**Table S9.** Levels (µg/kg) of mycotoxins in feed for sheep.

| <b>Sample</b> | <b>AFG2</b> | <b>AFG1</b> | <b>AFB2</b> | <b>AFB1</b> | <b>OTB</b> | <b>ZEA</b> | <b>OTA</b> | <b>DON</b> | <b>STER</b> |
|---------------|-------------|-------------|-------------|-------------|------------|------------|------------|------------|-------------|
| sheep-1       | <LOD*       | <LOD        | <LOD        | <LOD        | <LOD       | 74         | <LOD       | <LOQ*      | <LOQ        |
| sheep-2       | <LOD        | <LOD        | <LOD        | 5.13        | <LOD       | 121        | <LOD       | 315        | <LOQ        |
| sheep-3       | <LOD        | <LOD        | 0.78        | <LOD        | <LOD       | <LOD       | <LOD       | 287        | <LOQ        |
| sheep-4       | 0.64        | <LOD        | <LOD        | <LOD        | <LOD       | <LOD       | <LOD       | <LOQ       | <LOQ        |
| sheep-5       | <LOD        | <LOD        | <LOD        | <LOD        | <LOD       | 60         | <LOD       | <LOQ       | <LOQ        |
| sheep-6       | <LOD        | <LOD        | <LOD        | <LOD        | <LOD       | 157        | <LOD       | 97         | <LOQ        |
| sheep-7       | <LOD        | <LOD        | <LOD        | 3.12        | <LOD       | <LOD       | 5.47       | <LOQ       | <LOQ        |
| sheep-8       | 2.21        | <LOD        | 2.58        | <LOD        | <LOD       | 71         | <LOD       | 80         | <LOQ        |
| sheep-9       | <LOD        | <LOD        | <LOD        | <LOD        | <LOD       | 225        | <LOD       | 122        | <LOQ        |
| sheep-10      | <LOD        | <LOD        | <LOD        | <LOD        | <LOD       | <LOD       | <LOD       | <LOQ       | <LOQ        |
| sheep-11      | <LOD        | 5.21        | <LOD        | <LOD        | <LOD       | <LOD       | <LOD       | 101        | <LOQ        |
| sheep-12      | <LOD        | <LOD        | <LOD        | <LOD        | <LOD       | 325        | <LOD       | 354        | <LOQ        |
| sheep-13      | <LOD        | <LOD        | <LOD        | <LOD        | <LOD       | <LOD       | <LOD       | <LOQ       | <LOQ        |
| sheep-14      | <LOD        | <LOD        | <LOD        | <LOD        | <LOD       | 68         | <LOD       | 200        | <LOQ        |
| sheep-15      | <LOD        | <LOD        | 3.21        | <LOD        | <LOD       | 452        | <LOD       | 258        | <LOQ        |
| sheep-16      | <LOD        | <LOD        | <LOD        | 2.18        | <LOD       | 79         | <LOD       | <LOQ       | <LOQ        |
| sheep-17      | <LOD        | 3.12        | <LOD        | <LOD        | <LOD       | <LOD       | <LOD       | <LOQ       | <LOQ        |
| sheep-18      | <LOD        | <LOD        | <LOD        | <LOD        | <LOD       | 129        | <LOD       | 113        | <LOQ        |
| sheep-19      | <LOD        | <LOD        | <LOD        | <LOD        | <LOD       | <LOD       | <LOD       | <LOQ       | <LOQ        |
| sheep-20      | <LOD        | <LOD        | <LOD        | <LOD        | <LOD       | <LOD       | <LOD       | 136        | <LOQ        |
| sheep-21      | <LOD        | <LOD        | 4.85        | <LOD        | <LOD       | 88.4       | 15.1       | 118        | <LOQ        |
| sheep-22      | 3.12        | <LOD        | <LOD        | <LOD        | <LOD       | 125        | <LOD       | 225        | <LOQ        |
| sheep-23      | <LOD        | <LOD        | <LOD        | <LOD        | <LOD       | <LOD       | <LOD       | <LOQ       | <LOQ        |
| sheep-24      | <LOD        | 6.54        | 1.56        | 6.13        | <LOD       | 452        | <LOD       | 290        | <LOQ        |
| sheep-25      | <LOD        | <LOD        | <LOD        | <LOD        | <LOD       | <LOD       | <LOD       | <LOQ       | <LOQ        |
| sheep-26      | <LOD        | <LOD        | <LOD        | <LOD        | <LOD       | 46         | <LOD       | 222        | <LOQ        |
| sheep-27      | 2.54        | <LOD        | <LOD        | <LOD        | <LOD       | 57         | <LOD       | 335        | <LOQ        |
| sheep-28      | 2.68        | <LOD        | <LOD        | <LOD        | <LOD       | <LOD       | <LOD       | 89         | <LOQ        |
| sheep-29      | <LOD        | <LOD        | 0.93        | <LOD        | <LOD       | 226        | 29.3       | 101        | <LOQ        |
| sheep-30      | <LOD        | <LOD        | <LOD        | <LOD        | <LOD       | <LOD       | <LOD       | 190        | <LOQ        |
| sheep-31      | <LOD        | <LOD        | <LOD        | <LOD        | <LOD       | <LOD       | <LOD       | 132        | <LOQ        |
| sheep-32      | <LOD        | <LOD        | <LOD        | <LOD        | <LOD       | 114        | <LOD       | 154        | <LOQ        |
| sheep-33      | <LOD        | <LOD        | <LOD        | <LOD        | <LOD       | <LOD       | <LOD       | 168        | 5.6         |
| sheep-34      | 0.79        | 4.18        | <LOD        | <LOD        | <LOD       | <LOD       | <LOD       | 330        | <LOQ        |
| sheep-35      | <LOD        | <LOD        | <LOD        | 3.19        | <LOD       | 97.5       | 11.2       | <LOQ       | <LOQ        |
| sheep-36      | <LOD        | <LOD        | 1.57        | <LOD        | <LOD       | <LOD       | <LOD       | 115        | <LOQ        |
| sheep-37      | <LOD        | <LOD        | <LOD        | <LOD        | <LOD       | 165        | <LOD       | 440        | <LOQ        |
| sheep-38      | <LOD        | <LOD        | <LOD        | <LOD        | <LOD       | 158        | <LOD       | 397        | <LOQ        |
| sheep-39      | <LOD        | <LOD        | <LOD        | <LOD        | <LOD       | 178        | <LOD       | 232        | <LOQ        |
| sheep-40      | <LOD        | <LOD        | <LOD        | <LOD        | <LOD       | <LOD       | <LOD       | 93         | <LOQ        |
| sheep-41      | <LOD        | <LOD        | <LOD        | <LOD        | <LOD       | 215        | <LOD       | 114        | <LOQ        |

| Sample   | AFG2 | AFG1 | AFB2 | AFB1 | OTB  | ZEA  | OTA  | DON  | STER |
|----------|------|------|------|------|------|------|------|------|------|
| sheep-42 | <LOD | 2.87 | <LOD | 4.21 | <LOD | 425  | <LOD | 354  | <LOQ |
| sheep-43 | 0.87 | <LOD | <LOD | <LOD | <LOD | <LOD | 45.3 | 85   | <LOQ |
| sheep-44 | <LOD | <LOD | 2.1  | <LOD | <LOD | 501  | <LOD | 321  | <LOQ |
| sheep-45 | <LOD | <LOQ | <LOQ |
| sheep-46 | <LOD | <LOD | <LOD | <LOD | <LOD | 458  | <LOD | 887  | <LOQ |
| sheep-47 | <LOD | 332  | <LOQ |
| sheep-48 | <LOD | 4.87 | <LOD | <LOD | <LOD | 232  | <LOD | 546  | <LOQ |
| sheep-49 | <LOD | <LOD | <LOD | <LOD | <LOD | 220  | 26.8 | 128  | <LOQ |
| sheep-50 | <LOD | 741  | <LOQ |
| sheep-51 | <LOD | 332  | <LOQ |
| sheep-52 | <LOD | <LOQ | <LOQ |
| sheep-53 | <LOD | <LOD | <LOD | <LOD | <LOD | 338  | <LOD | <LOQ | <LOQ |
| sheep-54 | 3.58 | <LOD | <LOD | <LOD | <LOD | 187  | <LOD | 215  | <LOQ |
| sheep-55 | <LOD | <LOD | 0.86 | <LOD | <LOD | <LOD | <LOD | 389  | <LOQ |
| sheep-56 | <LOD | 466  | <LOQ |
| sheep-57 | <LOD | 336  | <LOQ |
| sheep-58 | <LOD | <LOD | <LOD | 4.56 | <LOD | 248  | <LOD | 213  | <LOQ |
| sheep-59 | 3.12 | <LOD | <LOD | <LOD | <LOD | 68   | <LOD | 213  | <LOQ |
| sheep-60 | <LOD | <LOD | <LOD | <LOD | <LOD | 54   | <LOD | 201  | <LOQ |
| sheep-61 | <LOD | 302  | <LOQ |
| sheep-62 | <LOD | 300  | <LOQ |
| sheep-63 | <LOD | 2.17 | <LOD | <LOD | <LOD | 658  | <LOD | <LOQ | <LOQ |
| sheep-64 | <LOD | <LOQ | <LOQ |
| sheep-65 | <LOD | <LOD | <LOD | <LOD | <LOD | 420  | <LOD | 125  | <LOQ |
| sheep-66 | 0.68 | <LOD | <LOD | <LOD | <LOD | <LOD | <LOD | 187  | <LOQ |
| sheep-67 | <LOD | <LOD | 3.25 | 4.69 | <LOD | 125  | <LOD | 145  | <LOQ |
| sheep-68 | <LOD | <LOD | <LOD | <LOD | <LOD | 61   | <LOD | 160  | <LOQ |
| sheep-69 | <LOD | 97   | <LOQ |
| sheep-70 | <LOD | <LOD | <LOD | <LOD | <LOD | <LOD | 6.1  | <LOQ | <LOQ |
| sheep-71 | 1.87 | 5.13 | <LOD | <LOD | <LOD | 86.5 | <LOD | 221  | <LOQ |
| sheep-72 | <LOD | <LOQ | <LOQ |
| sheep-73 | <LOD | <LOQ | <LOQ |
| sheep-74 | <LOD | <LOD | <LOD | <LOD | <LOD | 98.5 | <LOD | 101  | <LOQ |
| sheep-75 | <LOD | <LOQ | <LOQ |
| sheep-76 | <LOD | <LOD | <LOD | 2.78 | <LOD | <LOD | <LOD | 114  | <LOQ |
| sheep-77 | 0.73 | 3.65 | <LOD | <LOD | <LOD | 445  | <LOD | 418  | <LOQ |
| sheep-78 | <LOD | <LOQ | <LOQ |
| sheep-79 | <LOD | <LOQ | <LOQ |
| sheep-80 | <LOD | <LOD | <LOD | <LOD | <LOD | 147  | <LOD | 321  | <LOQ |
| sheep-81 | <LOD | <LOQ | <LOQ |
| sheep-82 | <LOD | <LOD | 2.87 | 5.13 | <LOD | 89.8 | <LOD | 158  | <LOQ |
| sheep-83 | 4.01 | <LOD | <LOD | <LOD | <LOD | <LOD | <LOD | <LOQ | <LOQ |
| sheep-84 | <LOD | 225  | <LOQ |
| sheep-85 | <LOD | <LOD | <LOD | <LOD | <LOD | 94.3 | 30.8 | 335  | <LOQ |
| sheep-86 | <LOD | <LOD | <LOD | <LOD | <LOD | 159  | <LOD | <LOQ | <LOQ |
| sheep-87 | <LOD | <LOD | 0.84 | <LOD | <LOD | 143  | <LOD | 114  | <LOQ |

| Sample    | AFG2 | AFG1 | AFB2 | AFB1 | OTB  | ZEA  | OTA  | DON  | STER |
|-----------|------|------|------|------|------|------|------|------|------|
| sheep-88  | <LOD | 148  | <LOQ |
| sheep-89  | <LOD | <LOD | <LOD | 5.64 | <LOD | 257  | <LOD | 156  | <LOQ |
| sheep-90  | 0.84 | <LOD | <LOD | <LOD | <LOD | <LOD | <LOD | 274  | 2.2  |
| sheep-91  | <LOD | <LOD | <LOD | <LOD | <LOD | 306  | <LOD | 315  | <LOQ |
| sheep-92  | <LOD | <LOD | 2.96 | <LOD | <LOD | <LOD | <LOD | <LOQ | <LOQ |
| sheep-93  | <LOD | <LOD | <LOD | <LOD | <LOD | 59   | <LOD | 425  | <LOQ |
| sheep-94  | 2.1  | <LOD | <LOD | <LOD | <LOD | 258  | <LOD | <LOQ | 3.1  |
| sheep-95  | <LOD | <LOD | 0.77 | <LOD | <LOD | <LOD | <LOD | 332  | <LOQ |
| sheep-96  | 0.9  | <LOD | <LOD | <LOD | <LOD | 225  | <LOD | 214  | 4.1  |
| sheep-97  | <LOD | 97   | 3.6  |
| sheep-98  | <LOD | <LOD | 1.33 | <LOD | <LOD | 319  | <LOD | 115  | <LOQ |
| sheep-99  | <LOD | 4.83 | <LOD | <LOD | <LOD | <LOD | <LOD | 107  | <LOQ |
| sheep-100 | <LOD | <LOD | <LOD | 5.81 | <LOD | 101  | <LOD | 81   | <LOQ |

\*LOD (ug/kg)

0.63

2.0

0.63

2.0

5.0

42.0

5.0

\*LOQ (ug/kg)

1.26

4.0

1.26

4.0

10.0

84.0

10.0

74.0

0.8

Italics: value >LOD <LOQ

**Table S10.** Correlation matrix (p=0.05).

|             | AFG2    | AFG1    | AFB2    | AFB1    | OTB | ZEA     | OTA    | DON     | STER |
|-------------|---------|---------|---------|---------|-----|---------|--------|---------|------|
| <b>AFG2</b> | 1       |         |         |         |     |         |        |         |      |
| <b>AFG1</b> | 0.2528* | 1       |         |         |     |         |        |         |      |
| <b>AFB2</b> | 0.0205  | 0.0155  | 1       |         |     |         |        |         |      |
| <b>AFB1</b> | -0.0328 | 0.0657  | 0.1736* | 1       | -   |         |        |         |      |
| <b>OTB</b>  | -       | -       | -       | -       | -   |         |        |         |      |
| <b>ZEA</b>  | 0.1149* | 0.1594* | 0.1040* | 0.0509  | -   | 1       |        |         |      |
| <b>OTA</b>  | -0.0368 | -0.0283 | 0.047   | -0.0387 | -   | 0.0686  | 1      |         |      |
| <b>DON</b>  | 0.0441  | 0.1025* | 0.0358  | 0.0632  | -   | 0.3129* | -0.058 | 1       |      |
| <b>STER</b> | -0.0336 | -0.0137 | 0.0051  | -0.0297 | -   | -0.0083 | 0.0158 | -0.0002 | 1    |
